# Supplementary material for: CoRe: a robustly benchmarked R package for identifying core-fitness genes in genome-wide pooled CRISPR-Cas9 screens
Source: PubMed Central journal article supplement (PMC8597285; doi:10.1186/s12864-021-08129-5), 2021-11-17
Supplement: 12864_2021_8129_MOESM6_ESM.pdf [file 12864_2021_8129_MOESM6_ESM.pdf]

**A**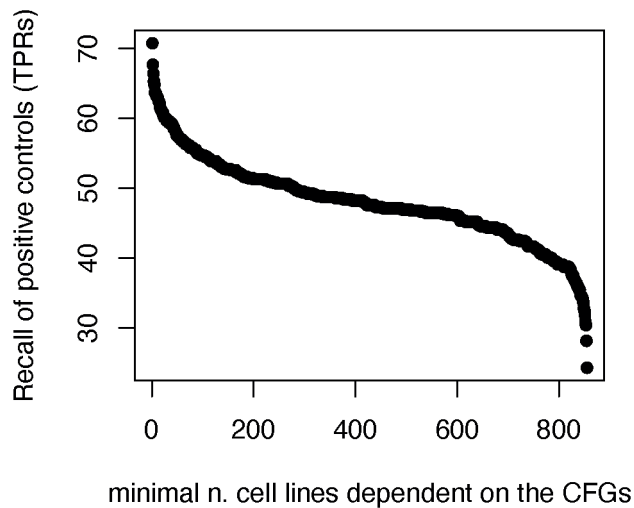**B**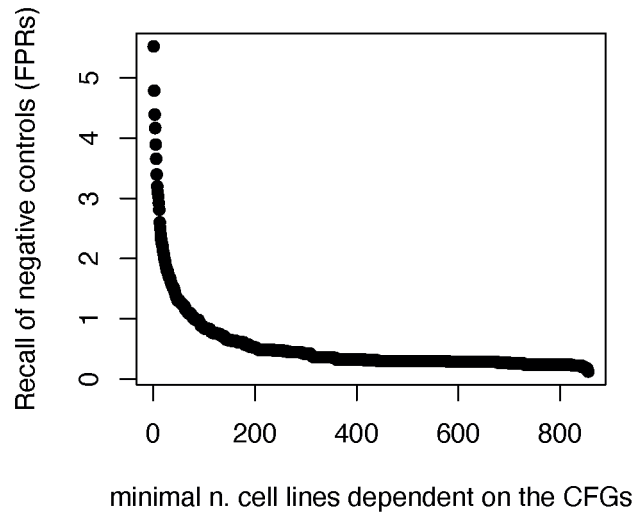**C**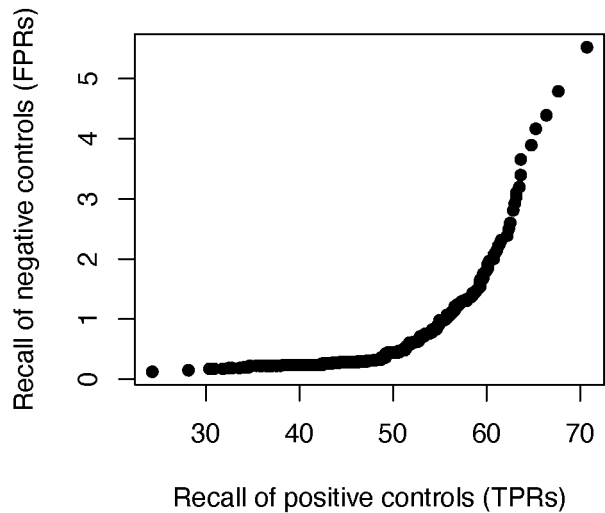

Figure S4
